# Supplementary material
Source: PubMed Central journal article supplement (PMC6347093)
Supplement: blood851667-suppl1.pdf [file blood851667-suppl1.pdf]

## **Supplementary Materials**

### **Regulation of SOX11 expression through CCND1 and STAT3 in mantle cell lymphoma**

Atish Mohanty<sup>1</sup>, Natalie Sandoval<sup>1</sup>, An Phan<sup>1</sup>, Thang V. Nguyen<sup>2</sup>, Robert W. Chen<sup>3</sup>, Elizabeth Budde<sup>3</sup>, Matthew Mei<sup>3</sup>, Leslie Popplewell<sup>3</sup>, Lan V. Pham<sup>4</sup>, Larry W. Kwak<sup>5</sup>, Dennis D. Weisenburger<sup>6</sup>, Steven T. Rosen<sup>7</sup>, Wing C. Chan<sup>6</sup>, Markus Müschen<sup>1</sup> and Vu N. Ngo<sup>1,6\*</sup>

## **Supplementary Methods**

### **Antibodies and chemicals**

The following antibodies were used: SOX11 (Abcam, Cambridge, MA), HA (C29F4), HDAC1, HDAC2, Histone H3, STAT3 and pY705 STAT3 (Cell Signaling Technology, Danvers, MA), CCND1 (M20), GAPDH, and LAMIN A/C (Santa Cruz, Dallas, TX), and H3K9/14Ac (Diagenode Inc., Denville, NJ). The following chemicals were used: cyclohexamide (Sigma, St. Louis, MO), SAHA, C646, AZD1480 (Selleck Chemicals, Houston, TX), and JAK inhibitor I (MilliporeSigma, Burlington, MA). IL21 was from R&D Systems (R&D Systems, Inc., Minneapolis, MN).

### **DNA transfection and viral transduction**

DNA transfection was performed by mixing DNA with JetPrime (PolyplusTransfection, New York, NY) and following the manufacturer's instructions. For retroviral transduction, a retroviral vector and a mixture of helper plasmids for viral envelope and *gag/pol* were transfected into HEK293T cells using JetPrime. Retroviral supernatants were harvested 48 hours after transfection and were used to transduce ecotropic receptor-expressing

target cells by centrifugation at 1200 xg for one hour in 8 µg/ml polybrene. For lentiviral transduction, a lentiviral vector and a mixture of helper plasmids for viral envelope VSV-G (pMD2.G) and *Gag/Pol/Rev/Tat* (psPAX2) were transfected into HEK293T cells using JetPrime. Lentiviral supernatants were combined 48 and 72 h after transfection and concentrated by centrifugation (100,000 xg for 2 h). Lentiviral transduction of target cells was performed by centrifugation at 1200 xg for one hour in 8 µg/ml polybrene.

### **Cell viability measurement**

Cell viability was assessed by flow cytometric analysis for propidium iodide (PI) negative population. In some experiments, shRNA knockdown vectors also co-express eGFP and the fractions of PI-, eGFP+ were analyzed by flow cytometry over time and compared with the early time fractions. A reduction in the GFP+ fractions over time indicates reduced cell viability.

### **Immunoprecipitation analyses**

Cells were lysed at  $4 \times 10^7$  cells/ml in IP buffer from Pierce Biotechnology (25 mM Tris·HCl pH 7.4, 150 mM NaCl, 1% NP-40, 1 mM EDTA, 5% glycerol), in presence of 1mM PMSF, 10 mM glycerophosphate, 1x concentration of Protease and Halt Phosphatase cocktail inhibitors for 30 min on ice. Lysates were cleared by centrifuging for 15 minutes at 14,000 xg at 4°C. Five micrograms of IgG1 isotype control was mixed with 50 µl of 1:1 slurry of PBS and protein A agarose beads and the mixture was added to 1 ml of lysate followed by one-hour incubation on a rotating mixer at 4°C. Lysates were cleared again by centrifugation for one minute at 2400 xg at 4°C. Supernatants were quantified for protein concentrations using the BCA protein assay. Approximately,

1.5 mg of lysate from each sample was incubated with 40 ml of 1:1 slurry of PBS and HA antibody (IgG1)-conjugated agarose beads (Sigma, St. Louis, MO) overnight on a rotating mixer at 4°C. Agarose beads were washed 4 times in 1ml of PBS containing 0.5% NP40 for 10 min each and pelleted by centrifugation at 2400 xg for 5 min. After discarding the supernatant, washed agarose beads were suspended in 100 µl of 1x sample buffer containing 5 µl of beta-mercaptoethanol and heat denatured for 5 min at 95°C. Samples were separated on 10% polyacrylamide gels and transferred to nitrocellulose membranes for western blot analysis.

### **Chromatin immunoprecipitation**

Chromatin immunoprecipitation was performed using the ChIP Assay Kit (Millipore, Temecula, CA) according to manufacturer's instructions. Briefly, two million formaldehyde-fixed cells were lysed in 200 µl of SDS lysis buffer and diluted to 2 ml in ChIP dilution buffer in the presence of protease inhibitors. Lysates were sonicated for 9 cycles of 30-second pulse at 30% power with 1 min gap on ice. Lysates were pre-cleared in salmon sperm DNA and protein A agarose by centrifugation. Prior to addition of antibody, 10% of the lysate was used for input and the remaining lysate was divided into two equal parts, one for IgG control and other for H3K9 AC9/14 or HDAC1 antibody. DNA was extracted by phenol-chloroform method and assayed by SYBR® Green-based RT-PCR. Phosphorylated STAT3 ChIP was performed with one million cells following the manufacturer's protocol for EZ-magna ChIP A/G (Millipore, Temecula, CA). Primer sequences for ChIP-qPCR are shown in **Supplementary Table S5**.

### **Cell fractionation**

Five million cells were harvested and washed twice in PBS. The cell pellet was suspended in 300  $\mu$ l of nuclear isolation buffer (NIB, 15 mM Tris-HCl pH 7.6, 60 mM KCl, 15 mM NaCl, 5 mM MgCl<sub>2</sub>, 1 mM CaCl<sub>2</sub>, 5.5% sucrose, 1mM DTT, 1x protease inhibitor and 1x phosphatase inhibitor cocktails). To these suspended cells, 300  $\mu$ l of NIB buffer containing 0.6% of NP40 was added and incubated on ice for 5 min followed by centrifugation at 2000 r.p.m. for 5 min at 4°C and transferred to a new tube, followed by denaturation in the presence of 2-mercaptoethanol and 200  $\mu$ l of 4x sample buffer at 95°C. The pellet was washed twice in NIB buffer and re-suspended in 300  $\mu$ l of nuclear extraction buffer (NEB, 25 mM Tris-HCl pH 8.0, 250 mM NaCl, 1mM EDTA, 10% glycerol, 0.5% NP-40, 1x protease inhibitor and 1x phosphatase inhibitor cocktails). DNA amount in the lysate was quantified and DNase I was added to a ratio of 1U of enzyme to 4  $\mu$ g of DNA for 1 h on ice. The reaction was stopped by adding EDTA and centrifuged at 13,000 r.p.m. for 30 min at 4°C. Supernatant was collected, denatured in the presence of 100  $\mu$ l of 4x sample buffer and used as nuclear soluble fraction. The pellet was washed again in NEB buffer, sonicated and denatured in 200  $\mu$ l of 1x sample buffer and used as nuclear insoluble fraction.

## Supplementary Figures

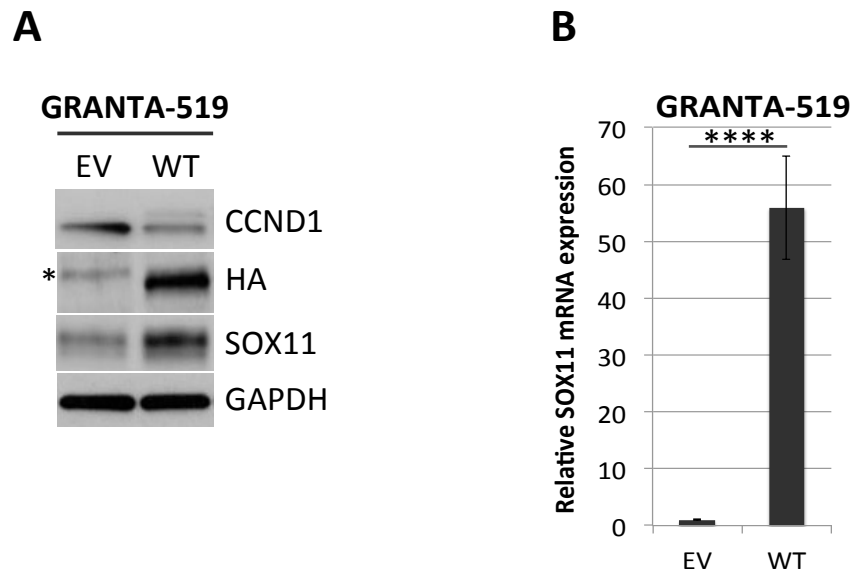

**Supplementary Figure S1. CCND1 upregulates SOX11 expression. A.** Immunoblot analysis of GRANTA-519 cells stably transduced with empty vector (EV) or WT CCND1-HA constructs. Cell lysates (30  $\mu$ g per lane) were separated by SDS-PAGE gel and immunoblotted with indicated antibodies. \* non-specific band. **B.** Quantitative PCR (qPCR) analysis of SOX11 mRNA expression. Cell lines generated as described in (A) and mRNAs were harvested for SOX11 qPCR. Shown are the means of mRNA expression levels after normalization to GAPDH signals from four independent amplification experiments. Error bars, SD. \*\*\*\*  $P < 0.0001$  by a 2-sided Student t-test.

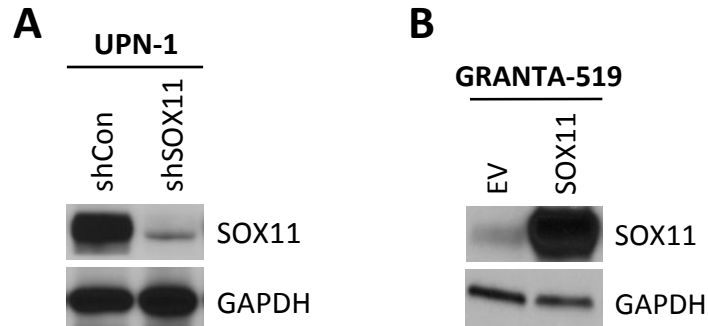

**Supplementary Figure S2. Validation of SOX11 antibody specificity.** **A.** UPN-1 cells were stably transduced with control or SOX11 shRNA and cell lysates were immunoblotted with indicated antibodies 2 days after transduction. **B.** GRANTA-519 cells were stably transduced with empty vector (EV) or SOX11-expressing vector and cell lysates were immunoblotted with indicated antibodies. The reduction or increase in the immunoblot signals after *SOX11* gene-specific knockdown (A) or overexpression (B), respectively, indicates the specificity of the SOX11 antibody.

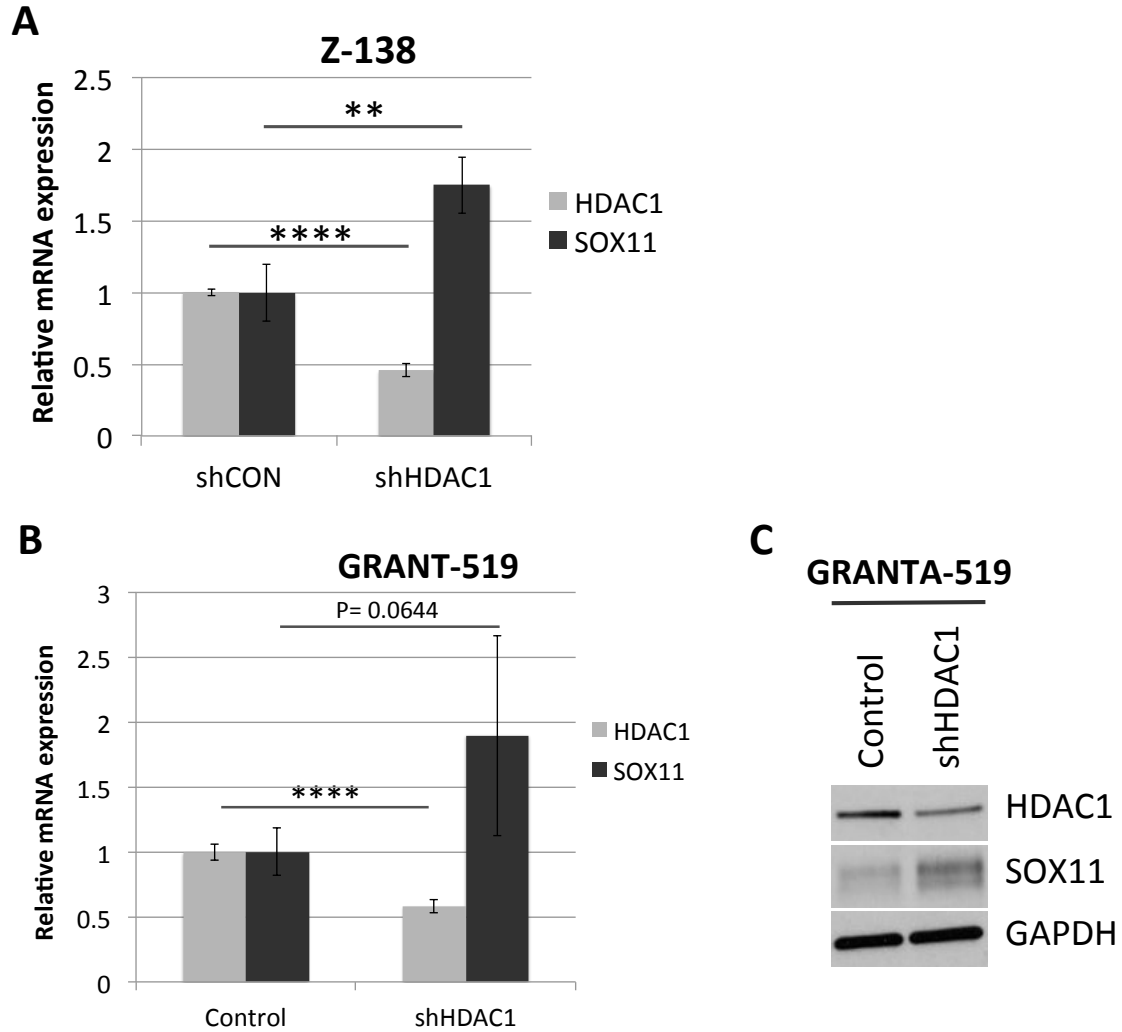

**Supplementary Figure S3. HDAC1 depletion upregulates SOX11 expression. A.** qPCR analysis of HDAC1 and SOX11 mRNA expression in Z-138 cells transduced with control or HDAC1 shRNA. Shown are the means of mRNA expression levels after normalization to GAPDH signals from four independent amplification experiments. **B.** qPCR analysis of HDAC1 and SOX11 mRNA expression in GRANTA-519 cells stably transduced with control or HDAC1 shRNA. Shown are the means of mRNA expression levels after normalization to GAPDH signals from four independent amplification experiments. Error bars, SD. \*\*  $P < 0.01$ , \*\*\*\*  $P < 0.0001$  by a 2-sided Student t-test. **C.** GRANTA-519 cells were generated as described in (B) and protein expression was analyzed by immunoblot analysis with indicated antibodies 3 days after transduction.

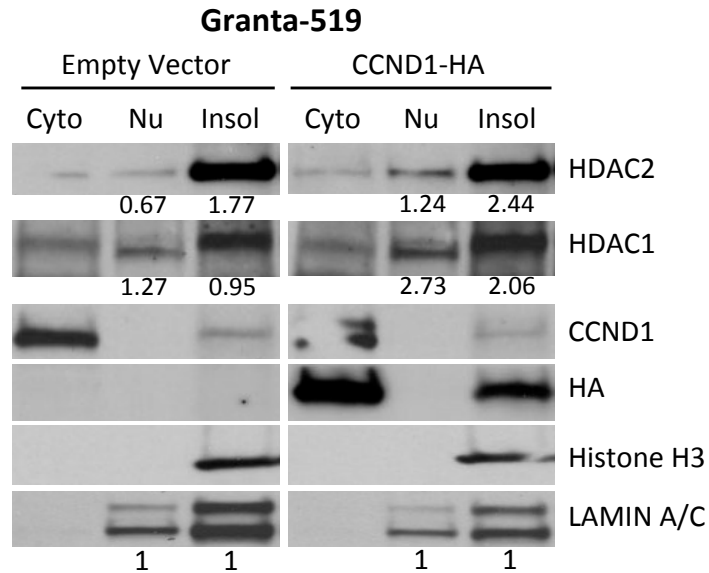

**Supplementary Figure S4. Sequestration of HDAC1 from chromatin in CCND1 overexpressing cells.** Cytosolic, soluble and insoluble nuclear extracts were prepared as described in Materials and Methods from GRANTA-519 cells that stably expressed empty vector or WT CCND1-HA. The extracts were immunoblotted with indicated antibodies. LAMIN A and histone H3 were used to confirm nuclear fractions. Cyto, cytoplasmic; Nu, soluble nuclear fraction; Insol, insoluble nuclear fraction. Numbers below immunoblots are relative densitometric values of corresponding bands after normalization to LAMIN A signals.



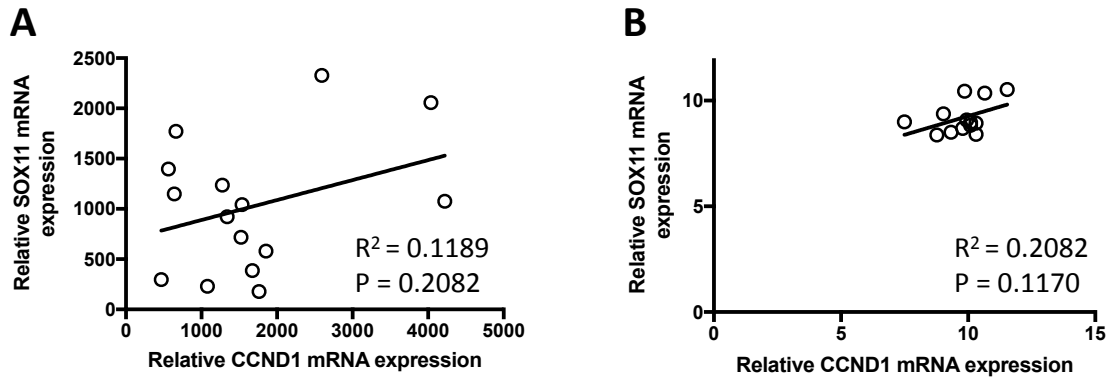

**Supplementary Figure S5. Correlation of SOX11 and CCND1 mRNA levels.** Linear regression analysis of SOX11 and CCND1 mRNA levels from SOX11 positive cases (see **Supplementary Table S6** for expression data in **A** and **Supplementary Table S7** for expression data in **B**) using GraphPad Software.

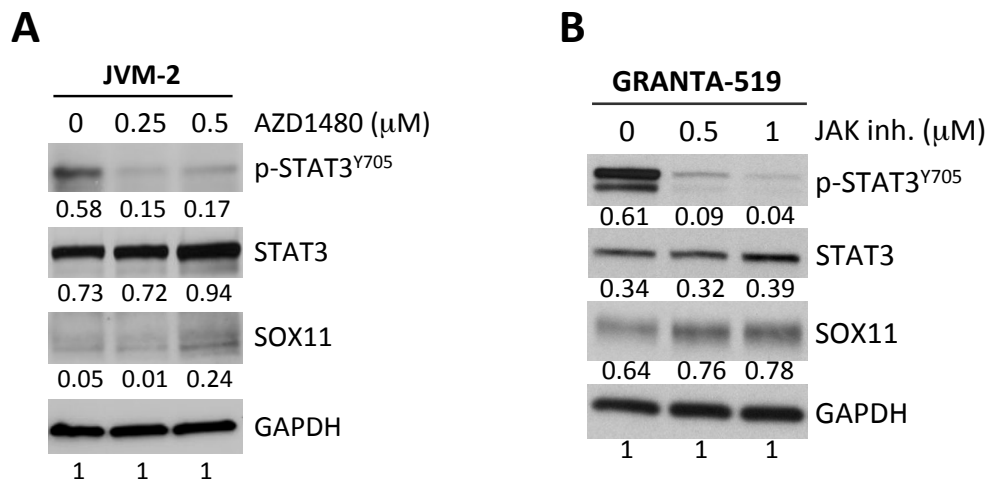

**Supplementary Figure S6. Effect of STAT3 inhibition on SOX11 expression. A.** JVM-2 cells were treated with indicated doses of the JAK1/2 inhibitor AZD1480 for 16 h and immunoblotted with indicated antibodies. **B.** GRANTA-519 cells were treated with indicated doses of the JAK inhibitor I (MilliporeSigma, Burlington, MA, USA), an inhibitor of STAT3, for 16 h and immunoblotted with indicated antibodies.

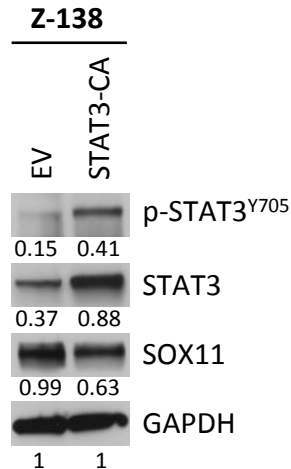

**Supplementary Figure S7. Effect of increased STAT3 activity on SOX11 expression.** Z-138 cells were transduced with EV or constitutive active STAT3 (STAT3-CA) and cell lysates were immunoblotted with indicated antibodies.

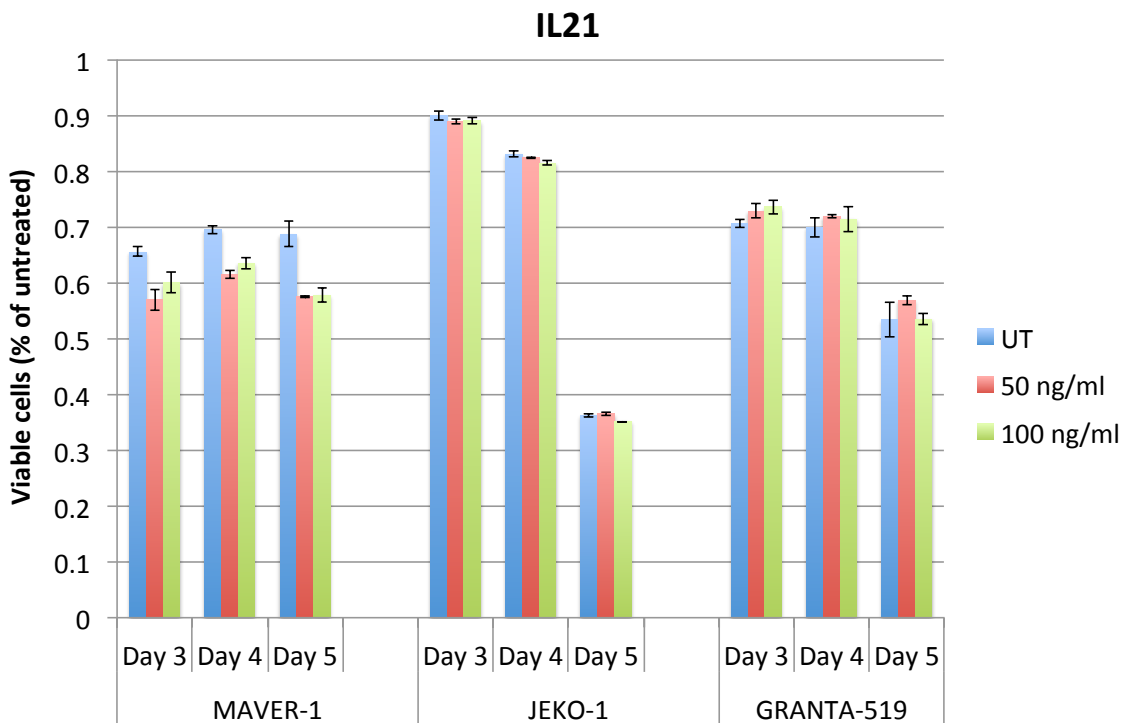

**Supplementary Figure S8. Little effect of IL21 on cell viability in some MCL cell lines.** Indicated MCL cell lines were treated with 50 or 100 ng/ml of IL21 and viable cells (PI-negative) were assessed by flow cytometry at indicated times. Shown are the means of PI-negative fractions compared to untreated (UT) samples from at least two independent experiments.

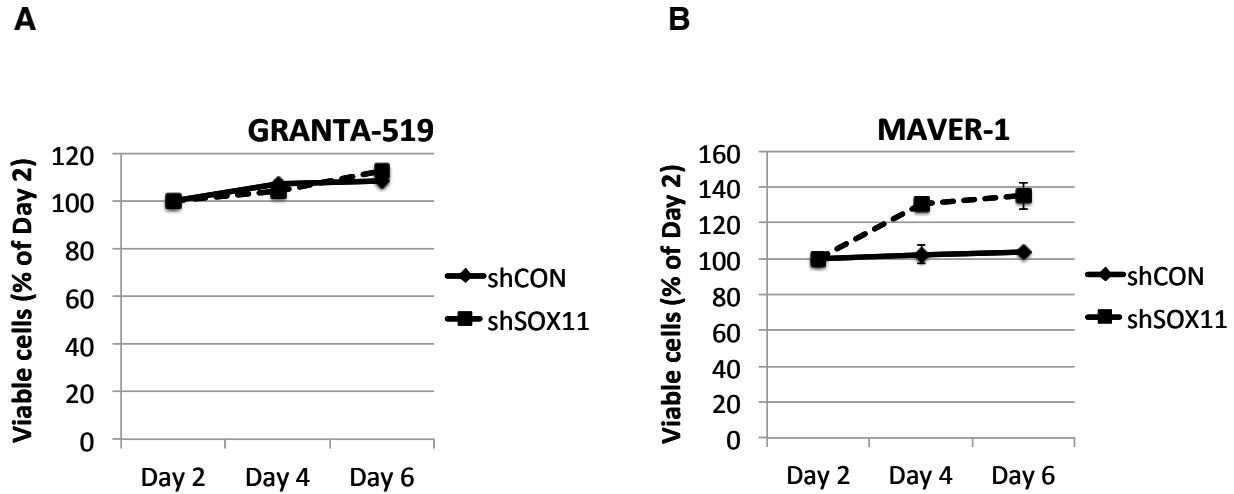

**Supplementary Figure S9. Effect of SOX11 knockdown on MCL cell viability.** GRANTA (A) and MAVER-1 (B) cells were transduced with control or SOX11 shRNA lentiviral vector that coexpresses GFP. Shown are the means of GFP<sup>+</sup> fractions compared to Day 2 from two independent experiments.

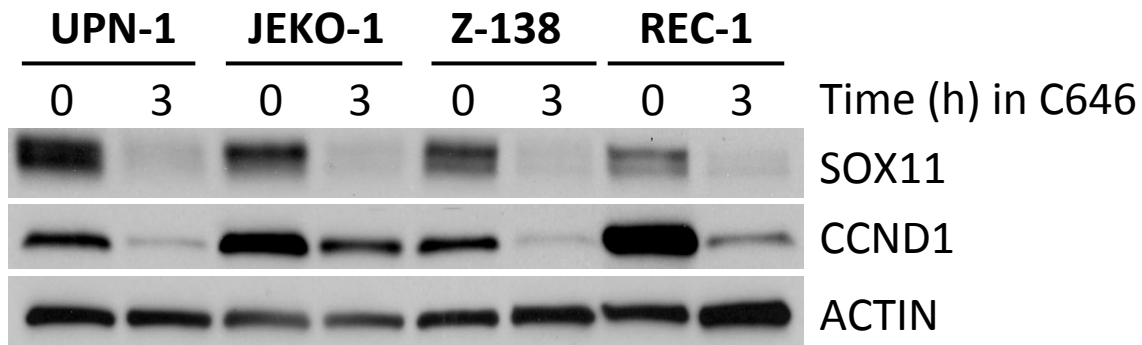

**Supplementary Figure S10. EP300 inhibition reduces SOX11 expression.** Immunoblot analysis of indicated cells treated with 10  $\mu$ M of C646 in serum-free medium for indicated times before cell lysates were prepared and separated by SDS-PAGE gel, followed by immunoblotting with indicated antibodies.

## Supplementary Tables

**Supplementary Table S1. Results of cell line authentication by short tandem repeat DNA profiling.**

| Locus      | Short tandem repeat profile |           |               |           |
|------------|-----------------------------|-----------|---------------|-----------|
|            | JEKO-1 (a)                  | Z-138 (a) | GRANT-519 (b) | UPN-1 (c) |
| TH01       | 7                           | 6         | 7, 8          | 8, 9.3    |
| D5S818     | 10, 13                      | 11, 13    | 9, 13         | 12, 13    |
| D13S317    | 8, 9                        | 9, 12     | 9, 11         | 13        |
| D7S820     | 10, 11                      | 8         | 10, 14        | 11, 13    |
| D16S539    | 12                          | 11        | 12, 12        | 13        |
| CSF1PO     | 9, 12                       | 10, 11    | 10, 10        | 12        |
| Amelogenin | X                           | X, Y      | X, X          | X         |
| vWA        | 14                          | 15, 18    | 17, 17        | 16, 18    |
| TPOX       | 8                           | 8         | 8, 8          | 8, 9      |

(a) Profile matches ATCC Reference Database profile

(b) Profile matches DSMZ Reference Database profile

(c) Profile not present in ATCC and DSMZ Databases

**Supplementary Table S2. MCL patient-derived xenografts.**

| Case  | Name      | Age | Gender | Disease Stage | Cytogenetics/Karyotype             | Exome-seq                                                                                     |
|-------|-----------|-----|--------|---------------|------------------------------------|-----------------------------------------------------------------------------------------------|
| 98848 | MCL PDX 4 | 81  | M      | Relapse       | <i>IGH-CCND1</i> by FISH           | <i>NOTCH1</i> <sup>P2514fs*</sup> <i>KRAS</i> <sup>S136R</sup>                                |
| 44685 | MCL PDX 5 | 63  | M      | Relapse       | t(11;14)(q13;q32) <i>IGH-CCND1</i> | <i>ATM</i> <sup>V1671fs*</sup> <i>WHSC1</i> <sup>E1009K</sup> <i>CREBBP</i> <sup>Q2257H</sup> |
| 91438 | MCL PDX 7 | 75  | M      | Progressive   | <i>IGH-CCND1</i> by FISH           | <i>TET2</i> <sup>N1103fs*</sup>                                                               |
| 96069 | MCL PDX 9 | 72  | F      | Refractory    | t(11;14)(q13;q32) <i>IGH-CCND1</i> | <i>BIRC3</i> <sup>L548fs*</sup>                                                               |

**Supplementary Table S3. List of shRNA sequences.**

| Gene  | Name in manuscript | RNAi sequences         | Used in figures |
|-------|--------------------|------------------------|-----------------|
| CCND1 | shCCND1            | GCCGAGAAGCTGTGCATCTAC  | 1C, D           |
| SOX11 | shSOX11            | CGCCAGCCAGAGCCCAGAGAA  | 1E, S2A         |
| HDAC1 | shHDAC1            | GAGGAAAGTCTGTTACTACTA  | 3C; S3A-C       |
| HDAC2 | shHDAC2            | CAGTCTCACCAATTTTCAGAAA | 3D              |
| STAT3 | shSTAT3            | GCTGACCAACAATCCCAAGAA  | 5H, I           |

### Supplementary Table S4. Validation of SOX11 mRNA quantitative PCR assays.

|                       | Ct values   |             |
|-----------------------|-------------|-------------|
|                       | RT+ cDNA    | RT- mock    |
| <b>SOX11 primer 1</b> | 23.8 ± 0.05 | 39.0 ± 0.59 |
| <b>SOX11 primer 2</b> | 25.2 ± 0.24 | 36.4 ± 0.81 |
| <b>GAPDH primer</b>   | 23.2 ± 0.13 | 38.6 ± 0.38 |

RT, reverse transcriptase; Ct, cycle threshold. Ct values are means of four independent amplification experiments ± S.D.

### Supplementary Table S5. List of PCR primers.

| Name             | Sequence (5'-3')              | Assay                          | References     |
|------------------|-------------------------------|--------------------------------|----------------|
| GAPDH primer F   | AAGGGCTCATGACCACAGTC          | RT-PCR                         |                |
| GAPDH primer R   | GGATGACCTTGCCCACAG            | RT-PCR                         |                |
| SOX11 primer 1-F | ACTCCAATGTCTCTTTTGC           | RT-PCR                         | Hamborg 2012   |
| SOX11 primer 1-R | GAACGGACTTTTTTTTTTTTTTTGAAGAT | RT-PCR                         | Hamborg 2012   |
| SOX11 primer 2-F | CATGTAGACTAATGCAGCCATTGG      | RT-PCR, ChIP-qPCR (amplicon 2) | Vegliante 2011 |
| SOX11 primer 2-R | CACGGAGCACGTGTCAATTG          | RT-PCR, ChIP-qPCR (amplicon 2) | Vegliante 2011 |
| SOX11 primer 3-F | GAGAGCTTGGGAAGCGGAGA          | ChIP-qPCR (amplicon 1)         | Vegliante 2011 |
| SOX11 primer 3-R | AGTCTGGGTCGCTCTCGTC           | ChIP-qPCR (amplicon 1)         | Vegliante 2011 |
| SOX11 primer 4-F | GAGAGCTTGGGAAGCGGAGA          | ChIP-qPCR (amplicon 1)         | Vegliante 2011 |
| SOX11 primer 4-R | CGTTCGATCTTGACCATACC          | ChIP-qPCR (amplicon 1)         |                |
| SOX11 primer 5-F | GCAGGTGTTTGATAATGCCTC         | ChIP-qPCR (amplicon 3)         |                |
| SOX11 primer 5-R | GCCAGAGCAATACAGTGAGTAATC      | ChIP-qPCR (amplicon 3)         |                |
| SOX11 primer 6-F | TTGGCTTTAGAATGAGGG            | ChIP-qPCR (amplicon 4)         |                |
| SOX11 primer 6-R | TCACACTGAAGTTTTGATGGG         | ChIP-qPCR (amplicon 4)         |                |

**Supplementary Table S6. mRNA expression data from GSE16455 (ref. 34).**

| Cases (SOX11 positive) | SOX11       |             |             | CCND1     |             | SOX11 average | CCND1 average |
|------------------------|-------------|-------------|-------------|-----------|-------------|---------------|---------------|
|                        | 204915_s_at | 204914_s_at | 204913_s_at | 208712_at | 208711_s_at |               |               |
| Conventional.MCL.1     | 993.6       | 2779.6      | 2397        | 4288.1    | 3788        | 2056.733      | 4038.05       |
| Conventional.MCL.10    | 546.7       | 2167.4      | 1475.6      | 504.8     | 617.9       | 1396.567      | 561.35        |
| Conventional.MCL.11    | 683         | 2394.5      | 2237.8      | 633       | 694.7       | 1771.767      | 663.85        |
| Conventional.MCL.13    | 460.8       | 1297.6      | 1468.2      | 4027.8    | 4413.9      | 1075.533      | 4220.85       |
| Conventional.MCL.14    | 184.2       | 344.8       | 163         | 1071.3    | 1088        | 230.6667      | 1079.65       |
| Conventional.MCL.15    | 384         | 1062.5      | 1320        | 1496.1    | 1184        | 922.1667      | 1340.05       |
| Conventional.MCL.2     | 1087.1      | 2530.4      | 3369.9      | 3833.6    | 1351.1      | 2329.133      | 2592.35       |
| Conventional.MCL.3     | 483.6       | 739.6       | 932         | 1824.7    | 1224.7      | 718.4         | 1524.7        |
| Conventional.MCL.4     | 465.5       | 1719.3      | 1263.6      | 749.2     | 532.2       | 1149.467      | 640.7         |
| Conventional.MCL.5     | 502.9       | 1307.6      | 1317.2      | 1671.9    | 1403.9      | 1042.567      | 1537.9        |
| Conventional.MCL.6     | 296.1       | 708.6       | 735         | 2416      | 1293        | 579.9         | 1854.5        |
| Conventional.MCL.7     | 148.9       | 328.2       | 415.6       | 434.7     | 500         | 297.5667      | 467.35        |
| Conventional.MCL.9     | 555         | 1742.2      | 1415        | 561.6     | 1988.6      | 1237.4        | 1275.1        |
| Indolent.MCL.4         | 239.2       | 553.3       | 368.2       | 2118.8    | 1231.1      | 386.9         | 1674.95       |
| Indolent.MCL.2         | 137.7       | 222.5       | 174.7       | 2200.5    | 1324        | 178.3         | 1762.25       |

  

| Cases (SOX11 negative) | SOX11       |             |             | CCND1     |             | SOX11 average | CCND1 average |
|------------------------|-------------|-------------|-------------|-----------|-------------|---------------|---------------|
|                        | 204915_s_at | 204914_s_at | 204913_s_at | 208712_at | 208711_s_at |               |               |
| Conventional.MCL.8     | 24.7        | 11.9        | 21.5        | 2.1       | 4951.4      | 19.36667      | 2476.75       |
| Conventional.MCL.12    | 4.8         | 1.4         | 32.5        | 1349.8    | 906.3       | 12.9          | 1128.05       |
| Indolent.MCL.1         | 12.5        | 2.3         | 0.6         | 857.4     | 508.1       | 5.133333      | 682.75        |
| Indolent.MCL.3         | 2.9         | 25.4        | 24.7        | 2203      | 1398.5      | 17.66667      | 1800.75       |
| Indolent.MCL.5         | 7.5         | 74          | 29.9        | 2055.6    | 922.4       | 37.13333      | 1489          |
| Indolent.MCL.6         | 4.9         | 10.3        | 3.5         | 1485.1    | 746.7       | 6.233333      | 1115.9        |
| Indolent.MCL.7         | 3.1         | 19.7        | 4.3         | 96.5      | 4792.7      | 9.033333      | 2444.6        |

**Supplementary Table S7. mRNA expression data from GSE36000 (ref. 16).**

| Cases (SOX11 positive)      | SOX11       |             |             | CCND1     |           | SOX11 average | CCND1 average |
|-----------------------------|-------------|-------------|-------------|-----------|-----------|---------------|---------------|
|                             | 204915_s_at | 204913_s_at | 204914_s_at | 208712_at | 208711_at |               |               |
| MCL_IGHV_UNMUT (R1394)      | 10.3621     | 10.0579     | 11.1429     | 11.8866   | 11.1948   | 10.5209667    | 11.5407       |
| MCL_IGHV_UNMUT (R1306)      | 8.90176     | 9.34356     | 9.88933     | 8.99182   | 9.06118   | 9.37821667    | 9.0265        |
| MCL_IGHV_UNMUT (R1332)      | 8.72074     | 8.6211      | 9.92335     | 10.1699   | 9.72807   | 9.08839667    | 9.948985      |
| MCL_IGHV_UNMUT (R1587)      | 9.5396      | 7.53551     | 9.92012     | 2.67941   | 12.3112   | 8.99841       | 7.495305      |
| MCL_IGHV_UNMUT (R1680)      | 7.40145     | 9.46408     | 9.93824     | 9.83827   | 10.7875   | 8.93459       | 10.312885     |
| MCL_IGHV_UNMUT (268-01-5TR) | 8.29182     | 7.66145     | 9.18539     | 9.05927   | 8.48165   | 8.37955333    | 8.77046       |
| MCL_IGHV_UNMUT (043-01-4TR) | 11.3831     | 8.93468     | 11.0159     | 10.9781   | 8.74049   | 10.44456      | 9.859295      |
| MCL_IGHV_UNMUT (R1338)      | 7.88213     | 8.53114     | 8.80149     | 10.4192   | 10.1986   | 8.40492       | 10.3089       |
| MCL_IGHV_UNMUT (R1388)      | 9.02642     | 8.16175     | 9.71772     | 10.1339   | 10.0619   | 8.96863       | 10.0979       |
| MCL_IGHV_MUT (R1400)        | 8.05998     | 9.09335     | 9.34785     | 9.95061   | 10.2426   | 8.83372667    | 10.096605     |
| MCL_IGHV_MUT (R1628)        | 9.68681     | 10.8834     | 10.5004     | 10.9729   | 10.3333   | 10.35687      | 10.6531       |
| MCL_IGHV_MUT (R1629)        | 8.32904     | 9.00908     | 8.72256     | 9.70786   | 9.86063   | 8.68689333    | 9.784245      |
| MCL_IGHV_MUT (R1938)        | 8.65126     | 7.52828     | 9.32923     | 9.47836   | 9.17358   | 8.50292333    | 9.32597       |

## Supplementary Materials

### Regulation of SOX11 expression through CCND1 and STAT3 in mantle cell lymphoma

Atish Mohanty<sup>1</sup>, Natalie Sandoval<sup>1</sup>, An Phan<sup>1</sup>, Thang V. Nguyen<sup>2</sup>, Robert W. Chen<sup>3</sup>, Elizabeth Budde<sup>3</sup>, Matthew Mei<sup>3</sup>, Leslie Popplewell<sup>3</sup>, Lan V. Pham<sup>4</sup>, Larry W. Kwak<sup>5</sup>, Dennis D. Weisenburger<sup>6</sup>, Steven T. Rosen<sup>7</sup>, Wing C. Chan<sup>6</sup>, Markus Müschen<sup>1</sup> and Vu N. Ngo<sup>1,6\*</sup>

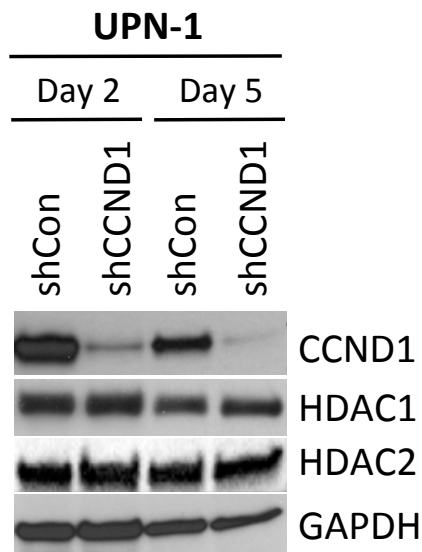

**Supplementary Figure S11. Immunoblot analysis shows effect of CCND1 knockdown on HDAC1 and HDAC2 expression.** UPN-1 cells were transduced with control or CCND1 shRNA and cell lysates at the indicated times were immunoblotted with indicated antibodies.

## Supplementary Materials

### Regulation of SOX11 expression through CCND1 and STAT3 in mantle cell lymphoma

Atish Mohanty<sup>1</sup>, Natalie Sandoval<sup>1</sup>, An Phan<sup>1</sup>, Thang V. Nguyen<sup>2</sup>, Robert W. Chen<sup>3</sup>, Elizabeth Budde<sup>3</sup>, Matthew Mei<sup>3</sup>, Leslie Popplewell<sup>3</sup>, Lan V. Pham<sup>4</sup>, Larry W. Kwak<sup>5</sup>, Dennis D. Weisenburger<sup>6</sup>, Steven T. Rosen<sup>7</sup>, Wing C. Chan<sup>6</sup>, Markus Müschen<sup>1</sup> and Vu N. Ngo<sup>1,6\*</sup>

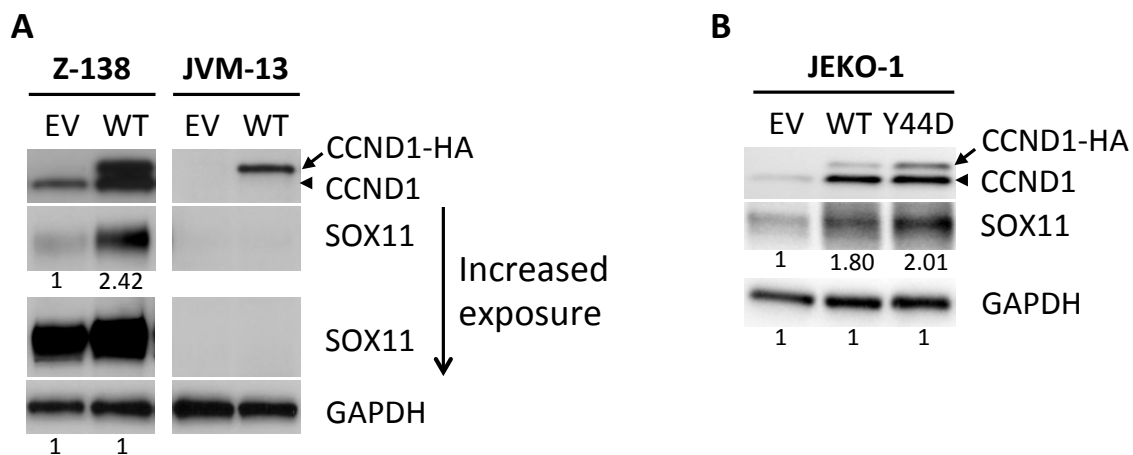

**Supplementary Figure S12. CCND1 upregulates SOX11 expression in Z-138 and JEKO-1 cells.** **A.** Immunoblot analysis of indicated MCL cell lines stably transduced with empty vector (EV), WT or Y44D mutant CCND1-HA constructs. Cell lysates were separated by SDS-PAGE gel and immunoblotted with indicated antibodies. Arrow indicates a mobility shift of the CCND1-HA protein. Arrowhead indicates endogenous CCND1. Numbers below immunoblots are relative densitometric values of corresponding bands after normalization to GAPDH and respective control signals.



## Supplementary Materials

### Regulation of SOX11 expression through CCND1 and STAT3 in mantle cell lymphoma

Atish Mohanty<sup>1</sup>, Natalie Sandoval<sup>1</sup>, An Phan<sup>1</sup>, Thang V. Nguyen<sup>2</sup>, Robert W. Chen<sup>3</sup>, Elizabeth Budde<sup>3</sup>, Matthew Mei<sup>3</sup>, Leslie Popplewell<sup>3</sup>, Lan V. Pham<sup>4</sup>, Larry W. Kwak<sup>5</sup>, Dennis D. Weisenburger<sup>6</sup>, Steven T. Rosen<sup>7</sup>, Wing C. Chan<sup>6</sup>, Markus Müschen<sup>1</sup> and Vu N. Ngo<sup>1,6\*</sup>

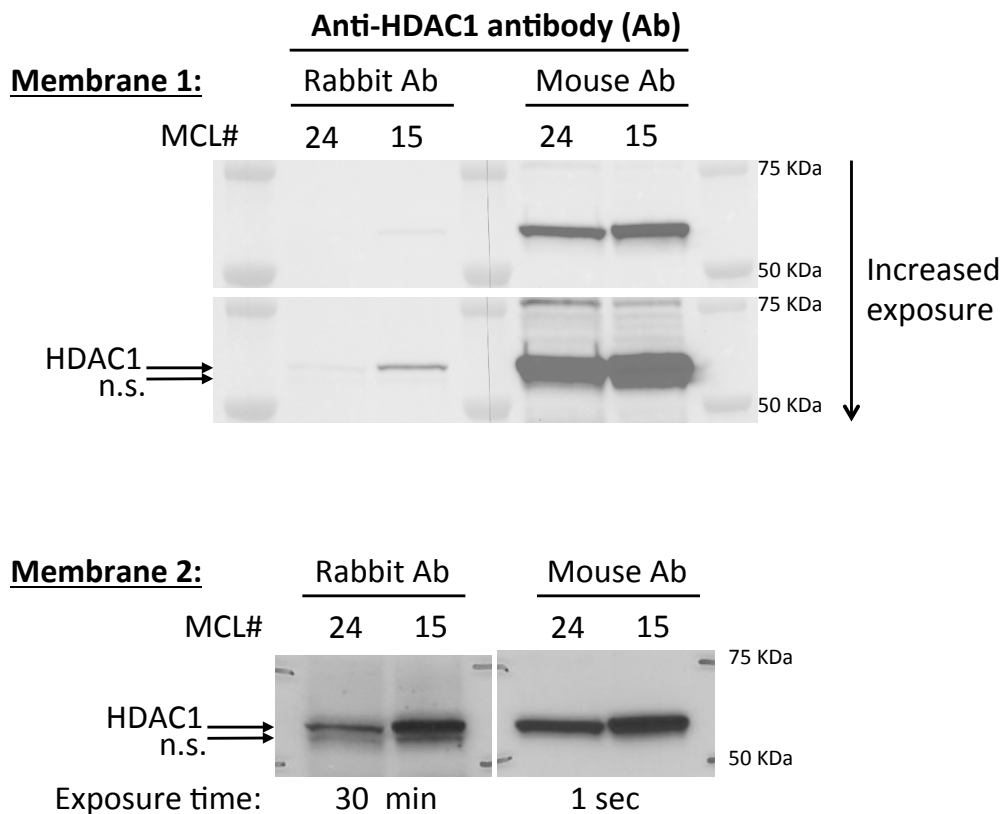

**Supplementary Figure S13. Comparison of rabbit and mouse anti-HDAC antibodies.** Lysates from MCL# 15 and 24 were immunoblotted with rabbit and mouse anti-HDAC1 antibodies. In membrane 1, the blot was imaged using a BioRad Imaging system and two different exposures were shown. In membrane 2, the blot was exposed to X-ray films at two different times to normalize the signal intensities from the two different antibodies. In both membranes, the single band specific for HDAC1 was detected by the mouse antibody and used as a positive control for the HDAC1-specific band. This HDAC1 specific band lines up with the upper band detected by the rabbit antibody. This result suggests that the bottom band detected by the rabbit antibody is non specific (n.s.).
